# Supplementary material for: Convenient, Sensitive and High-Throughput Method for Screening Botanic Origin
Source: PubMed Central journal article supplement — Sci Rep. 2014 Jun 23;4:5395. doi: 10.1038/srep05395 (PMC4066250; doi:10.1038/srep05395), 2014-06-23
Supplement: srep05395-s1.pdf [file srep05395-s1.pdf]

# Convenient, Sensitive and High-Throughput Method for Screening Botanic Origin

Yuan Yuan,<sup>1 ‡</sup> Chao Jiang,<sup>3 ‡</sup> Libing Liu,<sup>2 \*</sup> Shulin Yu<sup>1</sup>, Zhanhu Cui<sup>1</sup>, Min Chen<sup>1</sup>, Shufang Lin<sup>1</sup>, Shu Wang<sup>2</sup>, Luqi Huang<sup>1 \*</sup>

## Supporting Information

**Materials and instruments:** Poly[(9,9-bis(6'-*N,N,N*-triethylammonium)hexyl)fluorenylene phenylene] (PFP) was synthesized according to Feng et al.<sup>[18]</sup>. Large-fragment *Bst* DNA polymerase and inorganic (yeast) pyrophosphatase were purchased from New England Biolabs Inc.(Connecticut, USA). Shrimp alkaline phosphatase (SAP), Exonuclease I, and Taq DNA polymerase were purchased from TaKaRa Biotechnology Co. Ltd (Dalian, China). *N*-2-hydroxyethylpiperazine-*N*-2-ethanesulfonic acid (HEPES) and dimethyl sulfoxide (DMSO) were purchased from Merck Co. Ltd.(Darmstadt, Germany). Fluorescein-12-ddUTP (ddUTP-FI) and cyanine 3-dGTP (dGTP-Cy3) were purchased from Perkin Elmer. (Hong Kong, China). Primers were synthesized by Sangon Biotechnology Co. Ltd. (Shanghai, China), with a purified method of ULTRA polyacrylamide gel electrophoresis. Double-distilled water (ddH<sub>2</sub>O) was autoclaved at 120 °C for 15 min. Fresh *Lonicera* spp. plants were sampled from Beijing, Anhui, Guangxi, Shandong, Tianjin, Henan, and Guizhou provinces, China. Dried *Lonicera japonica* buds and twelve patented Chinese drugs were collected from pharmacies in Beijing and Nanjing, China. Fluorescence spectra were measured using a F-4500 spectrofluorimeter from Hitachi Inc. (Tokyo, Japan) equipped with a xenon lamp excitation source. Photographs of polymer solutions were taken using a Canon EOS 550D Digital camera under a hand-held UV lamp (ZF-7A, Shanghai Gucun Electron Optic Instrument Factory) with  $\lambda_{\max} = 365$  nm. For high-throughput product testing, the fluorescence signals were read on a microplate reader (Bio-Tek Synergy HT, USA) equipped with an excitation filter of 380/20 nm. The emission filters were 440/30 nm for PFP, 528/20 nm for Fluorescein and 574/20 nm for cyanine 3.

**Samples:** Fresh *Lonicera* spp. plants, dried buds (medicinal materials), and twelve patented Chinese drugs were collected (Table S1, S2).

**Supplementary Table 1.** Plant and medicinal materials samples in this paper

| Code                 | Species                  | Producing area        | Number | surveyor |
|----------------------|--------------------------|-----------------------|--------|----------|
| Plant                |                          |                       |        |          |
| LJ2012001            | <i>Lonicera japonica</i> | Hefei, Anhui prov.    | 1      | Peng HS  |
| LJ2012002-LJ2012003  | <i>Lonicera japonica</i> | Wuming, Guangxi prov. | 2      | Wu QH    |
| LJ2012004-LJ2012048  | <i>Lonicera japonica</i> | Linyi, Shandong prov. | 45     | Li SB    |
| LJ2012049-LJ2012058  | <i>Lonicera japonica</i> | Xiaozai, Henan prov.  | 10     | Liu HY   |
| LJ2012059- LJ2012070 | <i>Lonicera japonica</i> | Xinmi, Shandong prov. | 12     | Zhou FQ  |
| LJ2012071- LJ2012094 | <i>Lonicera japonica</i> | Fengqiu, Henan prov.  | 24     | Liu HY   |

|                                  |                                        |                              |    |         |
|----------------------------------|----------------------------------------|------------------------------|----|---------|
| LJ2012095- LJ2012106             | <i>Lonicera japonica</i>               | Huangdezheng, Henan prov.    | 12 | Zhou FQ |
| LJ2012107- LJ2012108             | <i>Lonicera japonica var. chinesis</i> | Beijing                      | 2  | Yuan QJ |
| LH2012001- LJ2012009             | <i>Lonicera hypoglauca</i>             | Henxiang, Guangxi prov.      | 9  | Wu QH   |
| LH2012010- LJ2012017             | <i>Lonicera hypoglauca</i>             | Mashan, Guangxi prov.        | 8  | Wu QH   |
| LH2012018- LJ2012026             | <i>Lonicera hypoglauca</i>             | Ziyuan, Guangxi prov.        | 9  | Wu QH   |
| LH2012027- LJ2012036             | <i>Lonicera hypoglauca</i>             | Ningming, Guangxi prov.      | 10 | Wu QH   |
| LM2012001-LM2012033              | <i>Lonicera macranthoides</i>          | Linyi, Shandong prov.        | 33 | Li SB   |
| LM2012034-LM2012039              | <i>Lonicera macranthoides</i>          | Wuming                       | 6  | Wu QH   |
| LM2012040-LM2012048              | <i>Lonicera macranthoides</i>          | Ziyuan, Guangxi prov.        | 9  | Wu QH   |
| LM2012049-LM2012056              | <i>Lonicera macranthoides</i>          | Guiyang, Guizhou prov.       | 8  | Zhou T  |
| LF2012001-LF2012010              | <i>Lonicera fulvotomentosa</i>         | Guilin, Guangxi prov.        | 10 | Wu QH   |
| LF2012011-LF2012018              | <i>Lonicera fulvotomentosa</i>         | Guiyang, Guizhou prov.       | 8  | Zhou T  |
| LC2012001-LF2012005              | <i>Lonicera confusa</i>                | Guiling, Guangxi prov.       | 5  | Wu QH   |
| LC2012006-LF2012008              | <i>Lonicera confusa</i>                | Linyi, Shandong prov.        | 3  | Li SB   |
| LO2012001-LO2012002              | <i>Lonicera similis</i>                | Linyi, Shandong prov.        | 2  | Li SB   |
| LO2012003                        | <i>Lonicera microphylla</i>            | Beijing                      | 1  | Hao JD  |
| LO2012004                        | <i>Lonicera tragophylla</i>            | Linyi, Shandong prov.        | 1  | Li SB   |
| LO2012005                        | <i>Lonicera tragophylla</i>            | Beijing                      | 1  | Peng HS |
| LO2012006- LO2012013             | <i>Lonicera tatarica</i>               | Beijing                      | 8  | Hao JD  |
| LO2012014-LO2012018              | <i>Lonicera dasystyla</i>              | Lingui, Guangxi prov.        | 5  | Wu QH   |
| LO2012019-LO2012021              | <i>Lonicera dasystyla</i>              | Nanning, Guangxi prov.       | 3  | Wu QH   |
| LO2012022-LO2012031              | <i>Lonicera dasystyla</i>              | Mashan, Guangxi prov.        | 10 | Wu QH   |
| LO2012032                        | <i>Lonicera akawakamii</i>             | Beijing                      | 1  | Hao JD  |
| LO2012033-LO2012037              | <i>Lonicera maackii</i>                | Beijing                      | 5  | Hao JD  |
| LO2012038                        | <i>Lonicera maackii</i>                | Hefei, Anhui prov.           | 1  | Peng HS |
| LO2012039-LO2012064              | <i>Lonicera maackii</i>                | Tianjin                      | 26 | Peng HS |
| LO2012065-LO2012069              | <i>Lonicera fragrantissima</i>         | Beijing                      | 5  | Hao JD  |
| LO2012070-LO2012074              | <i>Lonicera pampaninii</i>             | Guiyang, Guizhou prov.       | 5  | Zhou T  |
| Medicinal materials (dried buds) |                                        |                              |    |         |
| LJ2012109-LO2012113              | <i>Lonicera japonica</i>               | Beijing TongRenTang pharmacy | 5  | Hao JD  |
| LJ2012114-LO2012118              | <i>Lonicera japonica</i>               | Beijing YongAnTang pharmacy  | 5  | Hao JD  |

**Supplementary Table 2.** Patented Chinese drugs samples in this paper

| Chinese patent drug             | Identification method in Chinese Pharmacopoeia | Raw materials number |
|---------------------------------|------------------------------------------------|----------------------|
| Qing Re An Chuang Wan           | No method                                      | 9                    |
| Li Yan Jie Du Ke Li             | TLC                                            | 16                   |
| Jian Nao Bu Shen Wan            | microscopy                                     | 25                   |
| Jin Sang San Jie Wan            | microscopy                                     | 16                   |
| Niu Huang Qing Gong Wan         | microscopy,TLC                                 | 18                   |
| Xiao Er Yan Bian Ke Li          | TLC                                            | 8                    |
| Gan Mao Zhi Ke Ke Li            | No method                                      | 9                    |
| Lian Qiao Bai Du Wan            | TLC                                            | 19                   |
| Zhi Zi Jin Hua Wan              | microscopy                                     | 8                    |
| Qing Guo Wan                    | microscopy                                     | 8                    |
| Fu Fang Zhen Zhu An Chuang Pian | No method                                      | 15                   |
| Xiao Er Gan Mao Ning Tang Jiang | No method                                      | 15                   |

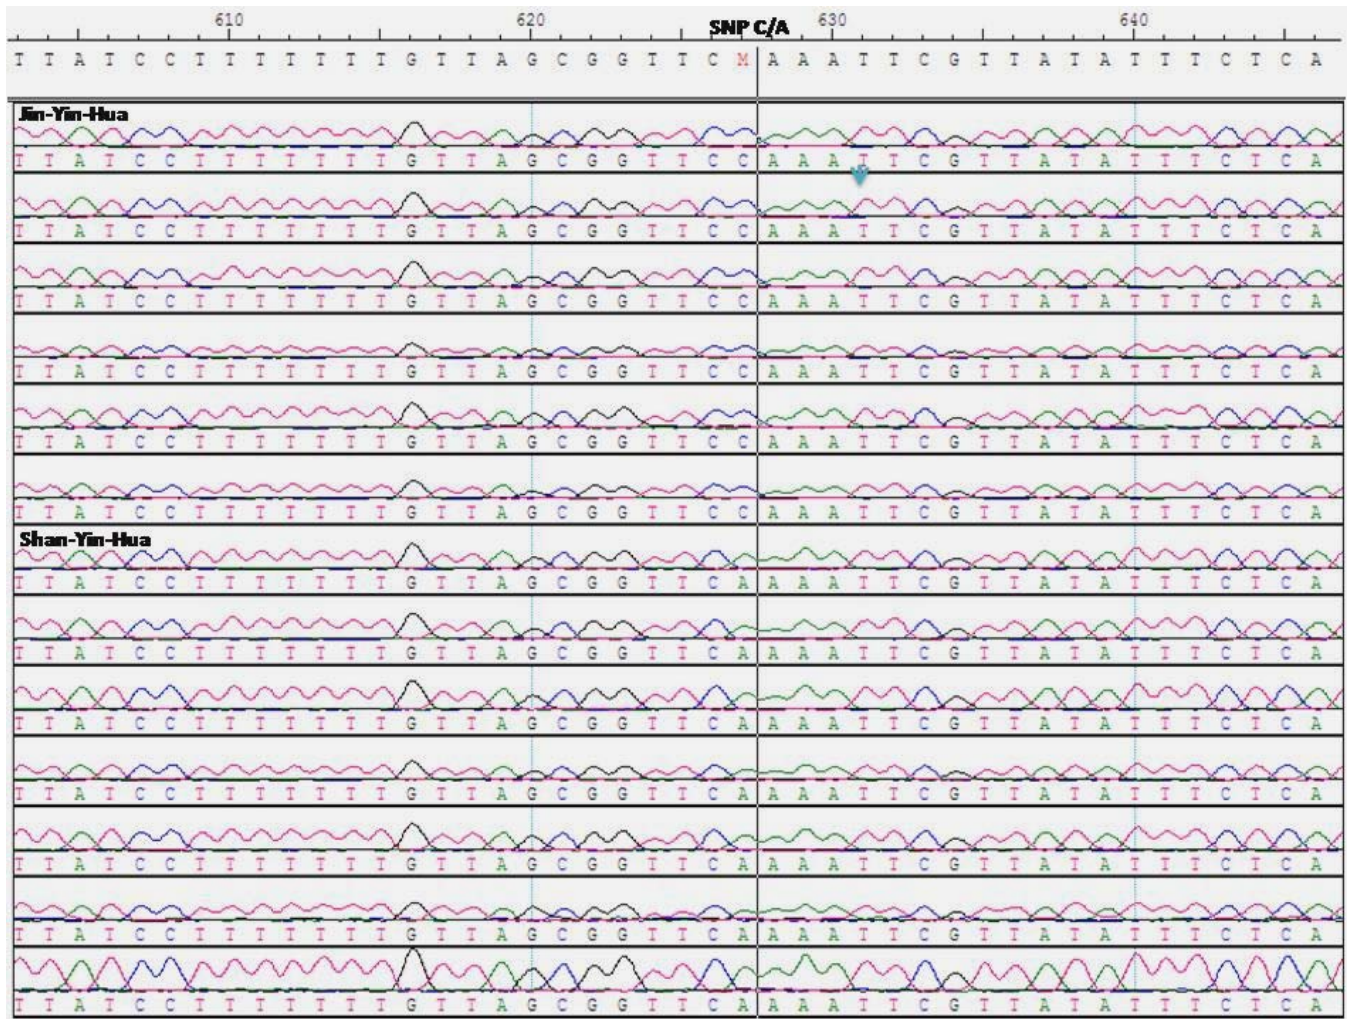

**Figure S1.** The sequencing results of Jin-Yin-Hua and Shan-Yin-Hua samples at SNP site C/A

**Supplementary Table 3.** Primers for allele-specific PCR detection

| Primer Name                    | Primer sequences                            | Amplicons Size(bp) | Reaction conditions                                                      |
|--------------------------------|---------------------------------------------|--------------------|--------------------------------------------------------------------------|
| <i>trnL</i><br><i>trnF</i>     | CGAAATCGGTAGACGCTACG<br>ATTGAACTGGTGACACGAG | 1050               | 94°C 5 min,<br>94°C 30 s, 54°C 30 s, 72°C 45 s,<br>35 cycles, 72°C 7 min |
| <i>trnL.F</i><br><i>trnL.R</i> | GGTCAAGTCCCTCTATCC<br>ATTGAACTGGTGACACGAG   | 424                | 94°C 5 min, 94°C 30 s, 54°C 30 s,<br>72°C 45 s, 30 cycles, 72°C 7 min    |

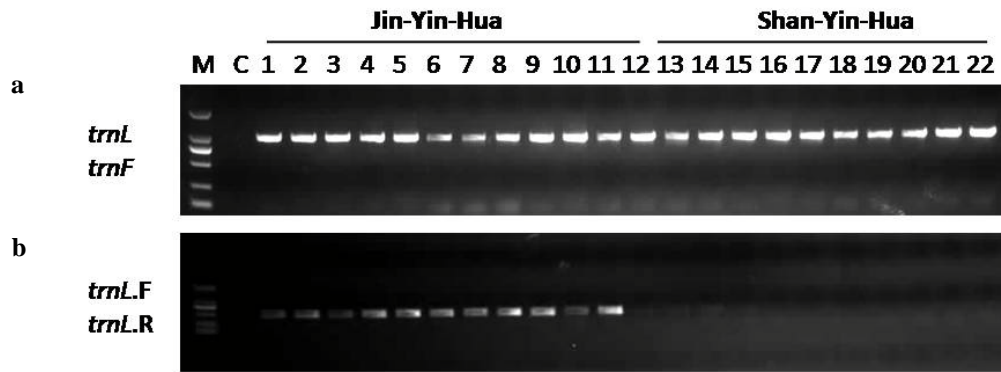

**Figure S2.** Allele-specific PCR detection using *trnL-trnF* (a) and *trnL.F-trnL.R* (b) primers. M, 2000bp DNA Ladder. 1-11, Jin-Yin-Hua samples. 12-22, Shan-Yin-Hua samples. A no-template control (NTC) was used as the blank.

**Supplementary Table 3.** Primers for LAMP

| Primer Name     | Primer sequences (5'→3')                       | Amplicons Size (bp) |
|-----------------|------------------------------------------------|---------------------|
| <i>trnL-FIP</i> | GGAGGATAAATAATTGGGGAGTCAATTTAGAAATCGTGAGGGTTCA | 92                  |
| <i>trnL-BIP</i> | AGCGGTTCCAAATTCGTTATATTTCAAAACATTCCGCTCAGATC   |                     |
| <i>trnL-F3</i>  | GTAAGAGGAAAATCCGTCGA                           |                     |
| <i>trnL-B3</i>  | TCACAAGACTTGTGATAAGAGA                         |                     |

**Supplementary Table 4.** Primers for single base extension

| Primer Name     | Primer sequences               |
|-----------------|--------------------------------|
| <i>trnL.SBE</i> | AGTAAGGTGGATGAGAAATATAACGAATTT |

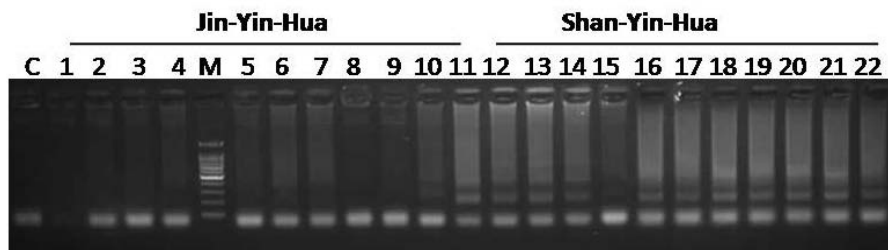

**Figure S3.** LAMP detection of Jin-Yin-Hua(1-11) and Shan-Yin-Hua(12-22) samples at SNP site C/A. M, 100 bp DNA Ladder.

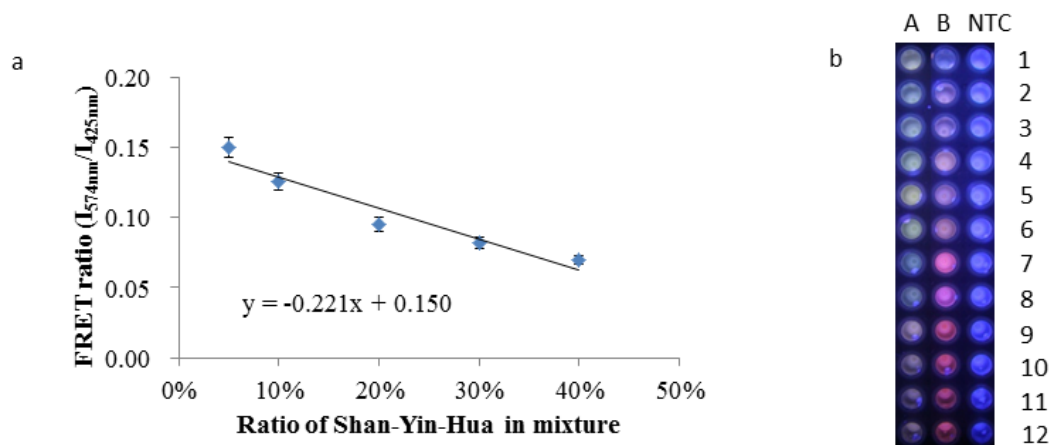

**Figure S4.** (a) FRET ratios from solutions containing PFP and extension products containing various percentages of Shan-Yin-Hua in mixture. (b) A photograph of fluorescence pattern on a microplate corresponding to mixture containing various percentages of Jin-Yin-Hua and Shan-Yin-Hua, including A1-3, 0:100 (only Shan-Yin-Hua), A4-6, 50:50 (50% of Shan-Yin-Hua), A7-9, 60:40 (40% of Shan-Yin-Hua), A10-12, 70:30 (30% of Shan-Yin-Hua), B1-3, 80:20 (20% of Shan-Yin-Hua), B4-6, 90:10 (10% of Shan-Yin-Hua), B7-9, 95:5 (5% of Shan-Yin-Hua), and B10-12, 100:0 (only Jin-Yin-Hua).
